# Supplementary material for: In silico Experimentation of Glioma Microenvironment Development and Anti-tumor Therapy
Source: PLoS Comput Biol. 2012 Feb 2;8(2):e1002355. doi: 10.1371/journal.pcbi.1002355 (PMC3271023; doi:10.1371/journal.pcbi.1002355)
Supplement: Table S2 — Stochastic parameters. (DOCX) [file pcbi.1002355.s008.docx]

**Supplementary Table S2. Stochastic Parameters**

| Deterministic variable | Stochastic description | Parameters | Dimension | Comment |
| --- | --- | --- | --- | --- |
| *r*ASC | *r*(1+*ε*sin(Ω*t*+*σW*(*t*)+Δ))  *r*ASC=0.0005  *ε*ASC=0.99  ΩASC=0.0045  *σ*ASC=10 | *r*ASC is the basal proliferation rate of ASC. *ε* is the amplitude of stochastic fluctuation; *σ* is the bandwidth factor ; Δ is a random phase uniformly distributed in [0, 2π]. | Ω (h-1),  Others are dimensionless | *r* > 0,  0 ≤ *ε*< 1, |
| *r*glioma | *r*(1+*ε*sin(Ω*t*+*σW*(*t*)+Δ))  *r*glioma=0.0174  *ε*glioma=0.99  Ωglioma=0.1577  *σ*glioma=10 | *r*glioma is the basal proliferation rate of glioma. | Ω (h-1),  Others are dimensionless | *r* > 0,  0 ≤ *ε*< 1, |
| *r*astrocyte | *r*(1+*ε*sin(Ω*t*+*σW*(*t*)+Δ))  *r*astrocyte=0.0174  *ε*astrocyte=0.99  Ωastrocyte=0.1577  *σ*astrocyte=10 | *r*astrocyte is the basal proliferation rate of astrocyte. | Ω (h-1),  Others are dimensionless | *r*>0,  0 ≤ *ε*< 1, |
| *r*microglia | *r*(1+*ε*sin(Ω*t*+*σW*(*t*)+Δ))  *r*microglia=0.0174  *ε*microglia=0.99  Ωmicroglia=0.1577  *σ*microglia=10 | *r*microglia is the basal proliferation rate of microglia. | Ω (h-1),  Others are dimensionless | *r*>0,  0 ≤ *ε*< 1, |
| *p*glio_astro | *p*(1+*ε*sin(Ω*t*+*σW*(*t*)+Δ));  *p*glio_astro=1×10-6  *ε*glio_astro=1  Ωglio_astro=0.1577  *σ*glio_astro=10 | *p*glio_astro is the average proportion of dividing astroglia mutate to glioma during each cell cycle; | Ω (h-1),  Others are dimensionless | , |
| *p*glio_ASC | *p*(1+*ε*sin(Ω*t*+*σW*(*t*)+Δ));  *p*glio_ASC=0.5  *ε*glio_ASC=1  Ωglio_ASC=0.0045  *σ*glio_ASC=10 | *p*glio_ASC is the average proportion of dividing ASC differentiate to glioma during each cell cycle. | Ω (h-1),  Others are dimensionless | , |
| *p*ASC_glio | *p*(1+*ε*sin(Ω*t*+*σW*(*t*)+Δ));  *p*ASC_glio=1×10-4  *ε*ASC_glio=1  ΩASC_glio=0.1577  *σ*ASC_glio=10 | *p*ASC_glio is the average proportion of dividing glioma dedifferentiate to ASC during each cell cycle. | Ω (h-1),  Others are dimensionless | , |
| *c*QSC | ;  *Y*k=1;  *λ*=*c*QSC=1; | *c*QSC is the average rate of supply of quiescent glioma stem cell from normal neural stem cell;  *ξ*(*t*) is Poisson white noise;  *N*(*t*) is Poisson counting process giving the number of pulses that arrive in the time interval [0, *t*];  *λ* is the mean arrival rate of *N*(*t*); |  |  |
| *c*microglia | ;  *Yk*=1;  *λ*=; | *c*microglia is the average rate of supply of microglia from monocytes; |  |  |
| *c*astroglia | ;  *Y*k=1;  *λ*=*c*astroglia; | *c*astroglia is the average rate of supply of astroglia from progenitors; |  |  |
| *ki* | *ki*max(0,1+*σN*(0,1)) | Truncated normal distribution |  |  |
