# Supplementary material for: In silico Experimentation of Glioma Microenvironment Development and Anti-tumor Therapy
Source: PLoS Comput Biol. 2012 Feb 2;8(2):e1002355. doi: 10.1371/journal.pcbi.1002355 (PMC3271023; doi:10.1371/journal.pcbi.1002355)
Supplement: Table S5 — Parameter profiles of three virtual patients for Figure 3 and 4. (DOCX) [file pcbi.1002355.s011.docx]

**Supplementary Table S5. Three virtual patients with different cytokine secretion rates profiles**

**(Unit: 10-21mol h-1)**

|  | Patient #1 | Patient #2 | Patient #3 |
| --- | --- | --- | --- |
| *k*IL1_glio | 60 | 20 | 15 |
| *k*IL1_micro | 30 | 15 | 15 |
| *k*IL1_astro | 5 | 3 | 1 |
| *k*IL6_glio | 60 | 20 | 10 |
| *k*IL6_micro | 100 | 50 | 20 |
| *k*IL6_astro | 10 | 5 | 1 |
| *k*IL10_micro | 10 | 40 | 90 |
| *k*TNFα_micro | 10 | 20 | 40 |
| *k*TNFα_astro | 1 | 2 | 4 |
| *k*TGFβ_ASC | 0.15 | 0.15 | 0.15 |
| *k*TGFβ_glio | 10 | 40 | 110 |
| *k*TGFβ_micro | 15 | 50 | 90 |
| *k*EGF_glio | 10 | 60 | 100 |
| *k*EGF_micro | 10 | 60 | 100 |
| *k*VEGF_ASC | 30 | 30 | 30 |
| *k*VEGF_glio | 90 | 60 | 30 |
| *k*VEGF_micro | 90 | 60 | 30 |
| *k*FGF_ASC | 60 | 60 | 120 |
| *k*FGF_glio | 60 | 60 | 120 |
| *k*HGF_glio | 90 | 20 | 10 |
| *k*HGF_micro | 90 | 60 | 40 |
| *k*MCP1_glio | 90 | 90 | 90 |
| *k*MIF_glio | 40 | 15 | 5 |
| *k*MIF_micro | 30 | 10 | 5 |
| *k*PGE2_micro | 10 | 30 | 40 |
| *k*GMCSF_glio | 60 | 60 | 60 |
| *k*GMCSF_micro | 60 | 60 | 60 |
| *k*GCSF_glio | 10 | 50 | 100 |
| *k*SCF_glio | 10 | 70 | 120 |
| *k*SCF_micro | 10 | 70 | 100 |
